# Supplementary material for: Natural Antibodies Produced in Vaccinated Patients and COVID-19 Convalescents Recognize and Hydrolyze Oligopeptides Corresponding to the S-Protein of SARS-CoV-2
Source: MDPI journal article supplement (doi:10.3390/vaccines11091494), 2023-09-15
Supplement: s1 [file s1]

# Supplementary data

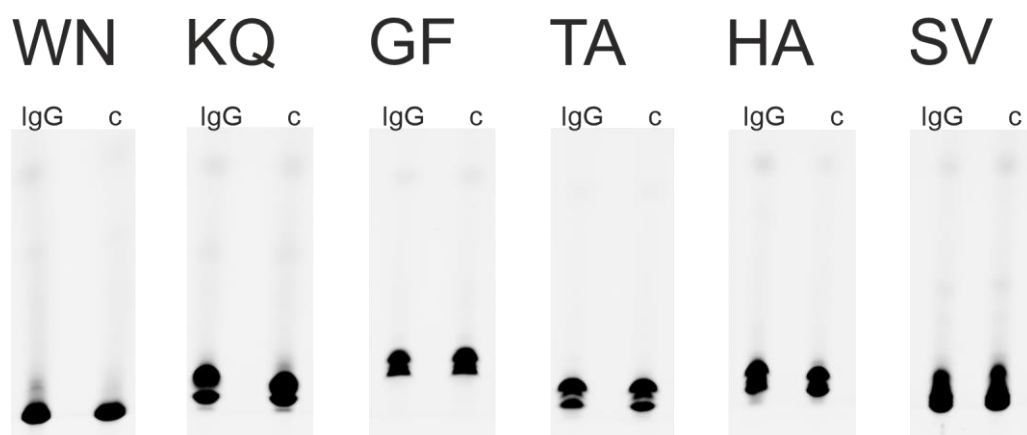

**Figure S1.** Analysis of OPs hydrolysis by antibodies from donors of the control group (which did not have COVID-19 and were not vaccinated). C - control without antibodies.

**Table S1.** Anonymized data on patients involved in the study.

| Con+Vac          |        |             |                          |                                                    |                                 |                                 |                                 |
|------------------|--------|-------------|--------------------------|----------------------------------------------------|---------------------------------|---------------------------------|---------------------------------|
| ID               | Gender | Age         | Date of blood collection | Date of I Vaccination                              | Date of II Vaccination          | Antibody titer to S-protein, PC | Antibody titer to N-protein, PC |
| 2024             | M      | 57          | 18.02.2021               | 14.01.2021                                         | 04.02.2021                      | 8.8                             | 6.2                             |
| 2032             | F      | 40          | 26.02.2021               | 01.02.2021                                         | 22.02.2021                      | 11.1                            | 5.8                             |
| 2033             | F      | 39          | 26.02.2021               | 09.02.2021                                         | 02.03.2021                      | 11.3                            | 9.6                             |
| 2034             | F      | 22          | 26.02.2021               | 09.02.2021                                         | 02.03.2021                      | 10.8                            | 5.4                             |
| 2103             | F      | 29          | 18.06.2021               | 26.04.2021                                         | 17.05.2021                      | 14.1                            | 7.3                             |
| 2105             | F      | 28          | 23.06.2021               | 08.02.2021                                         | 02.03.2021                      | 14.3                            | 8.5                             |
| 2112             | F      | 40          | 30.06.2021               | 08.02.2021                                         | 01.03.2021                      | 8.6                             | 5.1                             |
| 2128             | F      | 22          | 16.08.2021               | 22.02.2021                                         | 24.03.2021                      | 8.2                             | 6.9                             |
| 2132             | F      | 42          | 23.08.2021               | 08.02.2021                                         | 01.03.2021                      | 9.6                             | 7.2                             |
| 2131             | F      | 38          | 23.08.2021               | 08.02.2021                                         | 01.03.2021                      | 10.3                            | 8.5                             |
| 2134             | M      | 56          | 23.08.2021               | 08.02.2021                                         | 01.03.2021                      | 9.7                             | 7.9                             |
| 2145             | F      | 38          | 15.09.2021               | 25.12.2021                                         | 15.01.2021                      | 11.0                            | 10.1                            |
| 2146             | M      | 35          | 15.09.2021               | 08.02.2021                                         | 01.03.2021                      | 6.1                             | 3.3                             |
| 2158             | M      | 34          | 07.10.2021               | 08.02.2021                                         | 01.03.2021                      | 12.4                            | 8.2                             |
| 2178             | F      | 65          | 20.10.2021               | 08.02.2021                                         | 01.03.2021                      | 7.7                             | 7.6                             |
| 2203             | M      | 32          | 08.02.2022               | 09.02.2021                                         | 02.03.2021                      | 13.2                            | 7.4                             |
| 2204             | F      | 35          | 08.02.2022               | 09.02.2021                                         | 02.03.2021                      | 4.2                             | 9.1                             |
| 2214             | M      | 30          | 24.02.2022               | 01.03.2021                                         | 21.03.2021                      | 5.8                             | 8.3                             |
| 2215             | F      | 19          | 24.02.2022               | 01.09.2021                                         | 22.09.2021                      | 7.8                             | 6.6                             |
| 2096             | F      | 33          | 07.06.2021               | 08.04.2021                                         | 30.04.2021                      | 12.1                            | 5.2                             |
| 2097             | M      | 33          | 07.06.2021               | 08.04.2021                                         | 30.04.2021                      | 12.5                            | 3.7                             |
| 2142             | F      | 41          | 13.09.2021               | 08.02.2021                                         | 01.03.2021                      | 9.8                             | 4.2                             |
| 2148             | F      | 36          | 16.09.2021               | 09.08.2021                                         | 30.08.2021                      | 6.6                             | 5.3                             |
| 2149             | F      | 57          | 16.09.2021               | 09.08.2021                                         | 30.08.2021                      | 5.1                             | 6.5                             |
| 2150             | M      | 36          | 20.09.2021               | 06.08.2021                                         | 27.08.2021                      | 12.8                            | 7.4                             |
| Statistics       |        |             |                          |                                                    |                                 |                                 |                                 |
| Mean ± SD        |        | 37±11       |                          |                                                    |                                 | 9.8±2.8                         | 6.9±1.8                         |
| Median [Q1; Q3]; |        | 36 [32; 40] |                          |                                                    |                                 | 9.8 [7.8; 12.1]                 | 7.2 [5.4; 8.2]                  |
| Min–Max          |        | 19–65       |                          |                                                    |                                 | 4.2–14.3                        | 3.3–10.1                        |
| Con              |        |             |                          |                                                    |                                 |                                 |                                 |
| ID               | Gender | Age         | Date of blood collection | Period after the first symptoms of COVID-19, weeks | Antibody titer to S-protein, PC | Antibody titer to N-protein, PC |                                 |

|                                |        |                      |                          |                          |                             |                                    |                                     |
|--------------------------------|--------|----------------------|--------------------------|--------------------------|-----------------------------|------------------------------------|-------------------------------------|
| 1016                           | M      | 42                   | 09.11.2020               | 3                        | 10.0                        | 6.3                                |                                     |
| 1020                           | F      | 35                   | 18.11.2020               | 6                        | 7.4                         | 5.2                                |                                     |
| 1026                           | M      | 21                   | 19.11.2020               | 5                        | 7.8                         | 5.4                                |                                     |
| 1040                           | M      | 36                   | 30.11.2020               | 6                        | 11.0                        | 7.8                                |                                     |
| 1091                           | M      | 36                   | 23.12.2020               | 10                       | 13.4                        | 10.9                               |                                     |
| 1116                           | F      | 66                   | 12.01.2021               | 6                        | 8.5                         | 6.8                                |                                     |
| 1117                           | M      | 75                   | 12.01.2021               | 6                        | 9.2                         | 5.3                                |                                     |
| 1131                           | F      | 35                   | 15.01.2021               | 6                        | 14.4                        | 10.7                               |                                     |
| 1132                           | F      | 26                   | 15.01.2021               | 6                        | 8.1                         | 6.4                                |                                     |
| 1136                           | F      | 28                   | 14.01.2021               | 8                        | 9.4                         | 7.9                                |                                     |
| 1137                           | M      | 24                   | 14.01.2021               | 12                       | 11.5                        | 9.8                                |                                     |
| 1138                           | M      | 42                   | 18.01.2021               | 14                       | 10.8                        | 8.8                                |                                     |
| 1140                           | F      | 32                   | 19.01.2021               | 9                        | 7.2                         | 4.5                                |                                     |
| 1142                           | F      | 38                   | 14.01.2021               | 6                        | 12.9                        | 10.5                               |                                     |
| 1143                           | F      | 37                   | 19.01.2021               | 6,5                      | 12.8                        | 9.6                                |                                     |
| 1145                           | M      | 36                   | 21.01.2021               | 14                       | 12.9                        | 10.8                               |                                     |
| 1146                           | F      | 75                   | 21.01.2021               | 8                        | 11.5                        | 9.3                                |                                     |
| 1156                           | M      | 45                   | 28.01.2021               | 12                       | 7.2                         | 3.2                                |                                     |
| 1159                           | F      | 62                   | 28.01.2021               | 16                       | 8.5                         | 5.1                                |                                     |
| 1164                           | F      | 24                   | 28.01.2021               | 6                        | 9.1                         | 5.9                                |                                     |
| 1167                           | F      | 59                   | 29.01.2021               | 13                       | 8.4                         | 4.7                                |                                     |
| 1176                           | F      | 42                   | 01.02.2021               | 13                       | 8.0                         | 3.4                                |                                     |
| 1180                           | F      | 37                   | 02.02.2021               | 7                        | 7.2                         | 4.6                                |                                     |
| 1206                           | M      | 36                   | 25.02.2021               | 15                       | 11.0                        | 8.5                                |                                     |
| 1212                           | M      | 57                   | 01.03.2021               | 13                       | 13.2                        | 9.1                                |                                     |
| Statistics                     |        |                      |                          |                          |                             |                                    |                                     |
| Mean ± SD                      |        | 42±15                |                          |                          | 10.1±2.3                    | 7.2±2.5                            |                                     |
| Median [Q1;<br>Q3];<br>Min–Max |        | 37 [35; 45]<br>21-75 |                          |                          | 9.4 [8.1; 11.5]<br>7.2-14.4 | 6.8 [5.2; 9.3]<br>3.2-10.9         |                                     |
| Vac                            |        |                      |                          |                          |                             |                                    |                                     |
| ID                             | Gender | Age                  | Date of blood collection | Date of I<br>vaccination | Date of II vaccination      | Antibody titer to<br>S-protein, PC | Antibody titer to N-<br>protein, PC |
| 2011                           | F      | 38                   | 03.02.2021               | 11.01.2021               | 14.01.2021                  | 11.0                               | 0.3                                 |
| 2012                           | F      | 45                   | 03.02.2021               | 24.12.2020               | 14.01.2021                  | 12.1                               | 0.2                                 |
| 2013                           | F      | 41                   | 03.02.2021               | 24.12.2020               | 24.12.2020                  | 11.2                               | 0.2                                 |
| 2017                           | F      | 40                   | 08.02.2021               | 27.12.2020               | 20.01.2021                  | 11.6                               | 0.2                                 |

|                                |        |                         |                          |            |                                 |                             |                                 |
|--------------------------------|--------|-------------------------|--------------------------|------------|---------------------------------|-----------------------------|---------------------------------|
| 2018                           | M      | 29                      | 08.02.2021               | 27.12.2020 | 20.01.2021                      | 11.4                        | 0.1                             |
| 2019                           | F      | 42                      | 08.02.2021               | 03.12.2020 | 24.12.2020                      | 11.5                        | 0.2                             |
| 2020                           | M      | 32                      | 09.02.2021               | 29.12.2020 | 20.01.2021                      | 13.4                        | 0.2                             |
| 2021                           | M      | 45                      | 09.02.2021               | 24.12.2020 | 18.01.2021                      | 11.1                        | 0.2                             |
| 2022                           | F      | 63                      | 17.02.2021               | 01.12.2020 | 21.12.2020                      | 6.3                         | 0.2                             |
| 2025                           | F      | 35                      | 24.02.2021               | 11.01.2021 | 01.02.2021                      | 9.8                         | 0.1                             |
| 2026                           | M      | 35                      | 24.02.2021               | 11.01.2021 | 01.02.2021                      | 6.8                         | 0.1                             |
| 2027                           | F      | 35                      | 25.02.2021               | 11.01.2021 | 01.02.2021                      | 9.5                         | 0.2                             |
| 2030                           | M      | 29                      | 25.02.2021               | 11.01.2021 | 01.02.2021                      | 9.9                         | 0.3                             |
| 2035                           | M      | 30                      | 26.02.2021               | 11.01.2021 | 01.02.2021                      | 10.7                        | 0.2                             |
| 2036                           | M      | 50                      | 26.02.2021               | 11.01.2021 | 01.02.2021                      | 8.6                         | 0.2                             |
| 2037                           | M      | 65                      | 26.02.2021               | 11.01.2021 | 01.02.2021                      | 8.0                         | 0.1                             |
| 2038                           | F      | 65                      | 26.02.2021               | 11.01.2021 | 01.02.2021                      | 8.0                         | 0.1                             |
| 2040                           | F      | 35                      | 01.03.2021               | 11.01.2021 | 01.02.2021                      | 8.7                         | 0.2                             |
| 2041                           | F      | 27                      | 02.03.2021               | 11.01.2021 | 01.02.2021                      | 8.1                         | 0.2                             |
| 2042                           | M      | 55                      | 02.03.2021               | 11.01.2021 | 01.02.2021                      | 8.1                         | 0.1                             |
| 2062                           | F      | 70                      | 02.03.2021               | 11.01.2021 | 01.02.2021                      | 8.1                         | 0.1                             |
| 2067                           | M      | 58                      | 29.03.2021               | 08.02.2021 | 01.03.2021                      | 6.9                         | 0.2                             |
| 2068                           | M      | 34                      | 29.03.2021               | 08.02.2021 | 01.03.2021                      | 6.2                         | 0.2                             |
| 2070                           | F      | 31                      | 30.03.2021               | 08.02.2021 | 01.03.2021                      | 11.0                        | 0.2                             |
| 2071                           | F      | 41                      | 02.04.2021               | 24.12.2020 | 14.01.2020                      | 11.6                        | 0.2                             |
| Statistics                     |        |                         |                          |            |                                 |                             |                                 |
| Mean ± SD                      |        | 43±13                   |                          |            |                                 | 9.6±2.0                     | 0.2±0.1                         |
| Median [Q1;<br>Q3];<br>Min–Max |        | 40 [34;<br>50]<br>27–70 |                          |            |                                 | 9.8 [8.1; 11.2]<br>6.2–13.4 | 0.2 [0.1; 0.2]<br>0.1–0.3       |
| Neg                            |        |                         |                          |            |                                 |                             |                                 |
| ID                             | Gender | Age                     | Date of blood collection |            | Antibody titer to S-protein, PC |                             | Antibody titer to N-protein, PC |
| 1021                           | F      | 44                      | 19.11.1020               |            | 0.5                             |                             | 0.1                             |
| 1022                           | M      | 56                      | 19.11.1020               |            | 0.3                             |                             | 0.1                             |
| 1027                           | F      | 40                      | 19.11.1020               |            | 0.4                             |                             | 0.3                             |
| 1028                           | F      | 40                      | 19.11.1020               |            | 0.2                             |                             | 0.2                             |
| 1034                           | F      | 39                      | 20.11.1020               |            | 0.2                             |                             | 0.2                             |
| 1037                           | F      | 29                      | 23.11.2020               |            | 0.3                             |                             | 0.2                             |
| 1038                           | F      | 40                      | 25.11.2020               |            | 0.5                             |                             | 0.1                             |
| 1039                           | M      | 39                      | 27.11.2020               |            | 0.8                             |                             | 0.1                             |

|                                |                      |    |                           |                           |     |
|--------------------------------|----------------------|----|---------------------------|---------------------------|-----|
| 1041                           | F                    | 22 | 24.11.2020                | 0.3                       | 0.3 |
| 1042                           | F                    | 60 | 24.11.2020                | 0.3                       | 0.2 |
| 1043                           | F                    | 62 | 25.11.2020                | 0.2                       | 0.3 |
| 1044                           | F                    | 46 | 24.11.2020                | 0.2                       | 0.1 |
| 1046                           | F                    | 42 | 26.11.2020                | 0.6                       | 0.4 |
| 1047                           | M                    | 23 | 26.11.2020                | 0.3                       | 0.2 |
| 1050                           | F                    | 32 | 04.12.2020                | 0.6                       | 0.2 |
| 1051                           | F                    | 50 | 04.12.2020                | 0.1                       | 0.2 |
| 1056                           | F                    | 34 | 03.12.2020                | 0.1                       | 0.2 |
| 1058                           | F                    | 26 | 03.12.2020                | 0.2                       | 0.1 |
| 1059                           | F                    | 33 | 03.12.2020                | 0.1                       | 0.1 |
| 1061                           | M                    | 30 | 03.12.2020                | 0.6                       | 0.2 |
| 1062                           | F                    | 22 | 03.12.2020                | 0.2                       | 0.2 |
| 1067                           | M                    | 31 | 07.12.2020                | 0.3                       | 0.2 |
| 1069                           | M                    | 49 | 07.12.2020                | 0.4                       | 0.2 |
| 1075                           | F                    | 39 | 14.12.2020                | 0.2                       | 0.3 |
| 1096                           | M                    | 59 | 23.12.2020                | 0.3                       | 0.1 |
| Statistics                     |                      |    |                           |                           |     |
| Mean ± SD                      | 39±12                |    | 0.3±0.2                   | 0.2±0.1                   |     |
| Median [Q1;<br>Q3];<br>Min–Max | 39 [31; 46]<br>22–62 |    | 0.3 [0.2; 0.4]<br>0.1–0.8 | 0.2 [0.1; 0.2]<br>0.1–0.4 |     |
